# Supplementary material
Source: Springer Nature journal article supplement (https://www.springermedizin.de/resource/supplementary/12876_2014_1089_MOESM2_ESM.pdf/9438464)

# Any Abdominal Symptoms

(N=521 Attacks in 149 Patients)

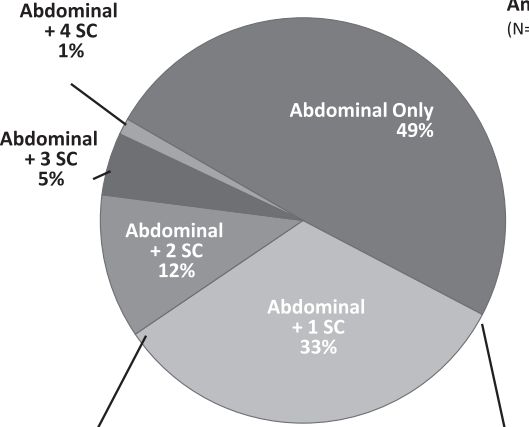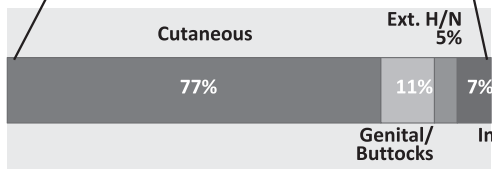

Supplement: MOESM2 [file 9438464]
